# Supplementary material
Source: Springer Nature journal article supplement (https://www.springermedizin.de/resource/supplementary/12872_2013_697_MOESM3_ESM.pdf/9430692)

### a. MMP-3 gene

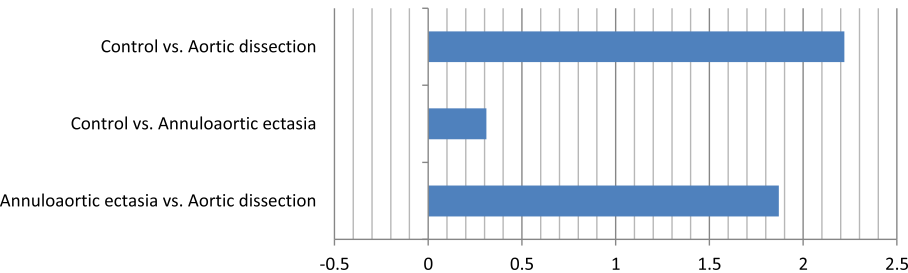

### b. MMP-9 gene

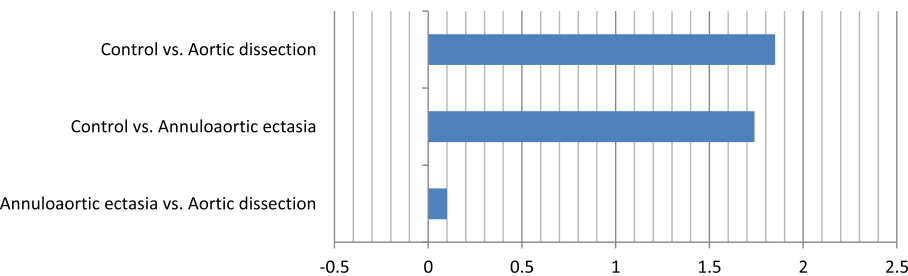

### c. c-FOS gene

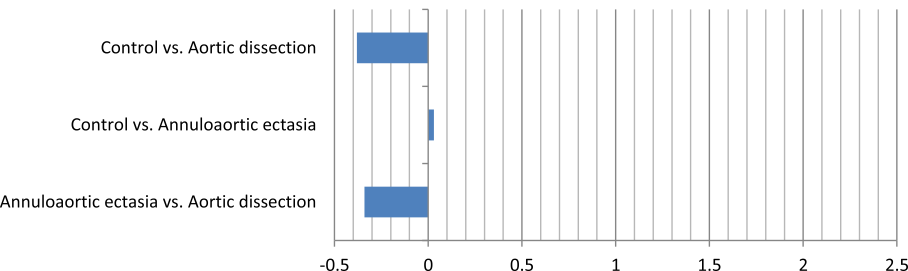

Supplement: MOESM3 [file 9430692]
